# Supplementary material
Source: PubMed Central journal article supplement (PMC2670671)
Supplement: 90639.2008_2.pdf [file 90639.2008_2.pdf]

Supplemental Figure 1: Expression of tissue factor by primary mouse bile duct epithelial cells. Isolated primary mouse BDECs cultured on collagen-coated slides were stained for tissue factor (TF) and cytokeratin 19 (CK19) as described in *Materials and Methods*. Representative photomicrographs (1000X magnification) of (A) DAPI (blue), (B) CK19 (red), and (C) TF (green) staining are shown. TF and CK19 images were digitally merged to determine colocalization of TF and CK19 staining (yellow, panel D).
